1 **A neural network account of memory replay and knowledge consolidation**

2 Running title: Category replay in deep neural networks

3 Daniel N. Barry<sup>1</sup> and Bradley C. Love<sup>1,2</sup>

4 1. Department of Experimental Psychology, University College London, 26 Bedford Way, London,

5 WC1H0AP, UK

6 2. The Alan Turing Institute, 96 Euston Road, London, NW12DB, UK

7 Corresponding author: [daniel.barry@ucl.ac.uk](mailto:daniel.barry@ucl.ac.uk), ORCID ID: [0000-0002-2474-5651](https://orcid.org/0000-0002-2474-5651)

8

9

10

11

12

13

14

15

16

17

18

19

20

21

22

23  
24  
25  
26  
27  
28  
29  
30  
31  
32  
33  
34  
35  
36  
37  
38  
39  
40  
41  
42  
43  
44  
45  
46  
47  
48

## Abstract

Replay can consolidate memories through offline neural reactivation related to past experiences. Category knowledge is learned across multiple experiences, and its subsequent generalisation is promoted by consolidation and replay during rest and sleep. However, aspects of replay are difficult to determine from neuroimaging studies alone. Here, we provided insights into category knowledge replay by simulating these processes in a neural network which assumed the roles of the human ventral visual stream and hippocampus. Generative replay, akin to imagining new instances of a category, facilitated generalisation to new experiences. Consolidation-related replay may therefore help to prepare us for the future as much as remember the past. Generative replay was more effective in later network layers equivalent to the lateral occipital cortex than layers corresponding to early visual cortex, drawing a distinction between neural replay and its relevance to consolidation. Category replay was most beneficial for newly acquired knowledge, suggesting replay helps us adapt to changes in our environment. Finally, we present a novel mechanism for the observation that the brain selectively consolidates weaker information; a reinforcement learning process in which categories were replayed according to their contribution to network performance. This reconceptualises consolidation-related replay as an active rather than passive process.

Keywords: consolidation, learning, memory, network, replay

## 49 **1. Introduction**

50 Memory replay refers to the reactivation of experience-dependent neural activity during resting  
51 periods. First observed in rodent hippocampal cells during sleep (Wilson & McNaughton, 1994), the  
52 phenomenon has since been detected in humans during rest (Hermans et al., 2017; Liu, Dolan, Kurth-  
53 Nelson, & Behrens, 2019; Schapiro, McDevitt, Rogers, Mednick, & Norman, 2018; Tambini & Davachi,  
54 2013; Wittkuhn & Schuck, 2021), and sleep (Schönauer et al., 2017; Zhang, Fell, & Axmacher, 2018).  
55 These investigations have revealed replayed experiences are more likely to be subsequently  
56 remembered, therefore replay has been proposed to strengthen the associated neural connections  
57 and to protect memories from being forgotten. This memory consolidation-related replay can be  
58 viewed as distinct from task-related replay, the neural reactivation observed during task performance  
59 which supports cognitive processes such as memory recall (Jafarpour, Fuentemilla, Horner, Penny, &  
60 Duzel, 2014; Michelmann, Staresina, Bowman, & Hanslmayr, 2019; Wimmer, Liu, Vehar, Behrens, &  
61 Dolan, 2020), visual understanding (Schwartenbeck et al., 2021), decision making (Liu, Mattar,  
62 Behrens, Daw, & Dolan, 2021), planning (Momennejad, Otto, Daw, & Norman, 2018) and prediction  
63 (Ekman, Kok, & de Lange, 2017). In this paper we challenge the notion of offline consolidation-related  
64 replay as a passive, memory-preserving process, and propose it is much more dynamic in nature. Using  
65 a computational approach, we test hypotheses that offline replay may be a creative process to serve  
66 future goals, that it matters exactly where in the brain replay occurs, that it helps us at particular  
67 stages of learning, and that the brain might actively choose the optimal experiences to replay.

68 Neural replay which supports memory consolidation during rest and sleep is generally  
69 assumed to be veridical, such that we commit the events of that day to long-term memory by replaying  
70 the episodes as they were originally experienced. However, there are circumstances in which this may  
71 be suboptimal or impractical. For example, a desirable outcome of category knowledge consolidation  
72 is to generalise to new experiences rather than recognise past instances, a phenomenon observed  
73 after sleep in infants (Friedrich, Wilhelm, Born, & Friederici, 2015; Horváth, Liu, & Plunkett, 2016). In  
74 addition, although sleep benefits category learning for a limited number of well-controlled

75 experimental stimuli (Schapiro et al., 2017), in the real world category learning takes place over many  
76 thousands of experiences, and storing each individual experience for replay is an impractical  
77 proposition. For these reasons, we propose the replay of novel, prototypical category instances would  
78 be a more efficient and effective solution. In fact, given the role of the hippocampus in both replay  
79 (Zhang et al., 2018) and the generation of prototypical concepts (Hassabis, Kumaran, Vann, & Maguire,  
80 2007), we consider this the most likely form of category replay. While evidence for such generative  
81 replay of category knowledge has yet to be discovered in the human brain, replay of sequences  
82 immediately following task performance in humans has been shown to be flexible, in that items can  
83 be re-ordered based on previously learned rules (Liu et al., 2019). This is reminiscent of “pre-play”  
84 observed during task performance in rodents, where hippocampal “place cells” observed to fire in  
85 specific locations reactivate in a different order to represent a route which has not been taken before  
86 (Gupta, van der Meer, Touretzky, & Redish, 2010).

87 Drawing inspiration from these observations, here we test the idea that replay which  
88 facilitates memory consolidation, occurring over extended offline time periods including sleep, might  
89 also be generative in nature, and that it’s flexibility may not just apply to the reorganisation of learned  
90 sequences, but the creation of entirely new instances of a category. While decoding the re-ordering  
91 of stimuli or route knowledge from brain data during replay has been shown to be a tractable  
92 approach, detecting entirely new instances of complex categories from the brain represents a  
93 significant challenge, and has yet to be demonstrated.

94 One approach to address this question is to simulate these processes in an artificial neural  
95 network. Prior research with artificial neural networks has modelled the replay of generated image  
96 stimuli (van de Ven, Siegelmann, & Tolias, 2020). While revealing a promising avenue of investigation,  
97 the results of this study cannot be easily extrapolated to the brain or human visual experience. For  
98 example, the structure of only five convolutional layers in the network employed represents just a  
99 fraction of the size of larger models which have been shown to extract visual representations similar  
100 in nature to those processed by the brain (Schrimpf et al., 2018), whose complex structure can be

101 mapped directly on to specific visual brain regions indicating a close correspondence in functional  
102 architecture (Devereux, Clarke, & Tyler, 2018; Güçlü & van Gerven, 2015; Khaligh-Razavi &  
103 Kriegeskorte, 2014), and whose object recognition performance compares favourably with humans  
104 (He, Zhang, Ren, & Sun, 2015). Further, the networks employed by van de Ven et al. (2020) had limited  
105 visual experience, having been pre-trained on just 10 categories of objects. In contrast, an adult  
106 human brain will harbour a lifetime of visual knowledge which facilitates the learning of novel  
107 concepts. Therefore, to simulate the learning and generative replay of new categories realistically in  
108 adults, using an experienced network which contains a pre-existing “lifetime” of knowledge about a  
109 vast range of other categories is an essential starting point. Another feature of the aforementioned  
110 study which limits the comparison to humans, is that the stimuli used were low-resolution  
111 photographs measuring 32 x 32 pixels, which do not reflect the complexity of human visual  
112 experience. To accurately simulate human learning and replay, much larger, high-resolution images  
113 which reflect the complexity and richness of everyday human visual experience are required as  
114 training stimuli. Finally, prior attempts at replay in neural networks, whether generative (Kemker &  
115 Kanan, 2017; van de Ven et al., 2020) or veridical (Hayes et al., 2021) have been deployed to address  
116 the “catastrophic forgetting” problem; the tendency of artificial networks to forget old categories  
117 when new ones are learned (French, 1999; Robins, 1995). As biological agents do not suffer from this  
118 issue, the findings of these studies offer little insight into human brain and behaviour.

119 In this study, we investigated whether offline generative replay of novel concepts facilitated  
120 subsequent generalisation to new experiences using models which reflect the human brain and the  
121 visual environment in which it learns. To do this, we implemented generative replay in a well-studied  
122 deep convolutional neural network (DCNN), which consists of a complex architecture organised into  
123 five blocks of convolutional layers and boasts a high “brain-score” indicating it extracts  
124 representations in a similar manner to the brain and performs comparably to humans in a  
125 categorisation task (Schrimpf et al., 2018). The network had prior experience of learning 1000 diverse  
126 categories of objects from over a million high-resolution complex naturalistic images, a process which

127 rivals a lifetime of human visual experience and which yields within the model the equivalent of a  
128 mature fully-functioning visual system. We tasked the model with learning 10 novel categories it had  
129 not seen before, using similarly high-resolution naturalistic images with an average resolution of  
130 around 400 x 350 pixels (Deng et al., 2009), representing an approximate 140-fold increase in visual  
131 details from stimuli used in prior work. This is equivalent to a human coming across 10 new categories  
132 and using their lifelong experience in processing visual information to extrapolate the relevant  
133 identifying features. After learning periods, we then simulated generative replay in the network, akin  
134 to human consolidation during sleep, and monitored the network's performance when it "woke up"  
135 the next day, to ascertain if such a process could explain the overnight improvements in generalisation  
136 observed in humans.

137         Another outstanding question regarding replay, is despite being associated with subsequent  
138 memory (Zhang et al., 2018), it is not clear where in the brain replay makes a demonstrable  
139 contribution towards generalisation. Replay has been observed throughout the brain, early in the  
140 ventral visual stream (Deuker et al., 2013; Ji & Wilson, 2007; Wittkuhn & Schuck, 2021), in the ventral  
141 temporal cortex (de Voogd, Fernández, & Hermans, 2016; Tambini, Ketz, & Davachi, 2010), the medial  
142 temporal lobe (Schapiro et al., 2018; Staresina, Alink, Kriegeskorte, & Henson, 2013) the amygdala,  
143 (Girardeau, Inema, & Buzsáki, 2017; Hermans et al., 2017), motor cortex (Eichenlaub et al., 2020) and  
144 prefrontal cortex (Peyrache, Khamassi, Benchenane, Wiener, & Battaglia, 2009). It is not known if  
145 replay in lower-level brain regions actually contributes to the observed memory improvements or  
146 whether the key neural changes are made in more advanced areas, and this question cannot be  
147 answered using current neuroimaging approaches. One prior study has implemented replay within an  
148 artificial neural network from a single location at the end of the network (van de Ven et al., 2020).  
149 However, because the compact architecture of this network did not have a specified functional  
150 correspondence with the human visual brain, and because replay from other locations within the  
151 network was not also implemented for comparison, it is difficult to draw conclusions from these  
152 results regarding effective replay locations in the human brain. In the current study, because we

153 simulated replay in a neural network which bears a close correspondence with the human ventral  
154 visual stream, we could compare the effectiveness of replay from different layers with a known  
155 representational correspondence to specific regions in the brain. In doing so, we aimed to find out the  
156 effective cortical targets of offline memory consolidation in humans.

157 Another open question regarding human replay is the duration of its involvement throughout  
158 the learning of novel concepts. It can take humans years to learn and consolidate semantic or  
159 conceptual knowledge (Manns, Hopkins, & Squire, 2003), but neuroimaging studies of replay are  
160 limited to a time-span of a day or two, therefore it is still not known how long replay contributes to  
161 this process. Humans are thought to “reconsolidate” information every time it is retrieved (Dudai,  
162 2012), suggesting replay might play a continual role in the lifespan of memory. However recordings in  
163 rodents have shown that replay diminishes with repeated exposure to an environment over multiple  
164 days (Giri, Miyawaki, Mizuseki, Cheng, & Diba, 2019), suggesting the brain may only replay recently  
165 learned, vulnerable information. Answering this question in humans remains a challenge because of  
166 the impracticalities of tracking replay events for extended periods. Simulation in a human-like neural  
167 network represents a feasible alternative to determine the relative contribution of replay to  
168 consolidation over long time-periods, an approach which has not been attempted to date. Here, we  
169 interleaved daily learning with nights of offline replay in a brain-like neural network to understand at  
170 what stage in learning replay may be most effective in humans.

171 An additional poorly understood principle of replay which we investigated in this study is why  
172 consolidation tends to selectively benefit weakly-learned over well-learned information (Drosopoulos,  
173 Windau, Wagner, & Born, 2007; Kuriyama, Stickgold, & Walker, 2004; McDevitt, Duggan, & Mednick,  
174 2015; Schapiro et al., 2018). Here, we modelled a candidate mechanism for how this occurs in the  
175 brain, by adding an auxiliary model (akin to the hippocampus) to the neocortical model, which could  
176 autonomously learn the best consolidation strategy, determining what to replay and when.

177 In addressing these outstanding questions regarding replay in the brain, we made a number  
178 of predictions. Because earlier brain regions are thought to extract equivalent basic features from all

179 categories, we predicted replay of experience would be more effective in promoting learning at  
180 advanced stages of the network. We hypothesised the replay of “imagined” prototypical replay events  
181 would be as effective as veridical replay in helping us to generalise to new, unseen experiences, thus  
182 supporting our conceptualization of replay as a creative process. We predicted that the benefits of  
183 replay may be confined to early in the learning curve when novel category knowledge is being  
184 acquired. Finally, we hypothesised that a dynamic interaction between a hippocampal and neocortical  
185 model would result in the prioritisation of weakly-learned items, in line with behavioural studies of  
186 memory consolidation.

187

## 188 **2. Materials and Methods**

### 189 **2.1 Neural network**

190 To simulate the learning of novel concepts in the brain, and test a number of hypotheses regarding  
191 replay, we trained a DCNN on 10 new categories of images. The neural network was VGG-16  
192 (Simonyan & Zisserman, 2014). Emulating the extent of real-world learning in humans, this network is  
193 trained on a vast dataset of 1.3 million high-resolution complex naturalistic photographs known as the  
194 ImageNet database (Deng et al., 2009), which contains recognisable objects from 1000 categories in  
195 different contexts much like what humans encounter on a daily basis. The network learns to associate  
196 the visual features of an object with its category label, until it can recognise examples of that object  
197 which it has never seen before, reflecting the human ability to generalise prior knowledge to new  
198 situations. The network takes a photograph’s pixels as input, and sequentially transforms this input  
199 into more abstract features, similar to the operation of the human ventral visual stream (Güçlü & van  
200 Gerven, 2015). It learns to perform these transformations by adjusting 138,357,544 connection  
201 weights across many layers. Its convolutional architecture reduces the number of possible training  
202 weights by searching for informative features in any area of the photographs.

203 This network which has been previously trained on 1000 categories can be thought of as  
204 equivalent to a fully functional visual system. This visual system allows humans to rapidly learn new



205 categories because it facilitates the extraction of useful features to support learning. Similarly, the  
206 VGG-16 network can learn novel categories which it has not learned before, based on its prior  
207 experience in interpreting visual input. In these experiments, we task the VGG-16 network with  
208 learning 10 new categories of images. To do this, we retained take the pre-trained “base” of this  
209 network, which consisted of 19 layers, organised into five convolutional blocks. Within each block  
210 there were convolutional layers and a pooling layer, with nonlinear activation functions. To this base,  
211 we attached two fully connected layers, each followed by a “dropout” layer, which randomly zeroed  
212 out 50% of units to prevent overfitting to the training set (Srivastava, Hinton, Krizhevsky, Sutskever, &  
213 Salakhutdinov, 2014). At the end of the network a SoftMax layer was attached, which predicted which  
214 of 10 classes an image belonged to. To facilitate the learning of 10 new classes, the weights of layers  
215 attached to the pre-trained base were randomly initialised. All model parameters were free to be  
216 trained. In total, 10 new models were trained, each learning 10 new and different classes.

217

## 218 **2.2 Stimuli**

219 Photographic stimuli for new classes were drawn randomly from the larger ImageNet 2011 fall  
220 database (Russakovsky et al., 2015), and were screened manually by the experimenter to exclude  
221 classes which bore a close resemblance to classes which VGG-16 was originally trained on. In total,  
222 100 new classes were selected, and randomly assigned to the 10 different models to be trained. Within  
223 each class, a set of 1,170 training images, 130 validation images, and 50 test images were selected.  
224 The list of the selected classes is available in Supplementary Table 1.

225

## 226 **2.3 Baseline training**

227 We first trained a model without implementing replay, to serve as a baseline measure of network  
228 performance, and compare with other conditions which implemented replay. Ten models were  
229 trained on 10 new and different classes. To further prevent overfitting to the training set, images were  
230 augmented before each training epoch. This is equivalent to a human viewing an object at different

231 locations, or from different angles, and facilitates the extraction of useful features rather than rote  
232 memorisation of experience. Augmentation could include up to 20-degree rotation, 20% vertical or  
233 horizontal shifting, 20% zoom, and horizontal flipping. Any blank portions of the image following  
234 augmentation were filled with a reflection of the existing image. Images were then pre-processed in  
235 accordance with Simonyan and Zisserman (2014). Depending on the experiment, the network was  
236 trained for 10 or 30 epochs. We used the Adam optimiser (Kingma & Ba, 2014) with a learning rate of  
237 0.0003. A small learning rate was chosen to reflect the fact that learning new categories in an adult  
238 human reflects a “fine-tuning” of an already highly-trained visual system. The training batch size was  
239 set to 36. The training objective was to minimise the categorical cross-entropy loss over the 10 classes.  
240 Training parameters were optimised based on validation set performance. We report the model’s  
241 performance metrics from the test set only. This is a collection of novel images from each category  
242 which the network does not learn nor is it tuned on, therefore reflecting the model’s ability to  
243 generalise to new stimuli after training, and is thus termed “generalisation performance” in the  
244 figures. Training was performed using TensorFlow version 2.2.

245

## 246 **2.4 Replay**

247 Replay was conducted between training epochs, to simulate “days” of learning and “nights” of offline  
248 consolidation. We conceptualised replay representations as generative, in other words they  
249 represented a prototype of that category never seen before, from a particular point in the network.  
250 This represents an alternative to storing every experience in our heads, in that we could replay  
251 important knowledge about the world without remembering everything. To generate these  
252 representations, the network activations induced by the training images from the preceding epoch  
253 were extracted from a particular layer in the network using the Keract toolbox (Remy, 2020). For each  
254 class separately, a multivariate distribution of activity was created from these activations,  
255 representing the unique relationship between units of the layer which were observed for that specific  
256 class. We then sampled randomly from this distribution, creating novel activation patterns for that

257 class at that point in the network (Figure 1). The end result was a representation that was a rough  
258 approximation of the layer's representations of that category if a real image was processed, but novel  
259 in nature. This would be equivalent in the brain to an approximate pattern of neural activity which is  
260 representative of that category at a particular stage in the ventral visual stream. These prototypical  
261 concepts would be likely generated from more high-level regions such as the hippocampus and  
262 prefrontal cortex (Bowman, Iwashita, & Zeithamova, 2020; Hassabis, Kumaran, Vann, et al., 2007).

263         The number of novel representations created for replay was equivalent to the number of  
264 original training images (1,170). To test where in the network replay is most effective, this process was  
265 performed at one of five different network locations, namely the max pooling layers at the end of each  
266 block (Figure 1). For the first four pooling layers, creating a multivariate distribution from such a large  
267 number of units was computationally intractable, therefore activations for each filter in these layers  
268 were first down-sampled by a factor of eight for layer one, by four for layers two and three and two  
269 for layer four. The samples drawn from the resulting distribution were then up-sampled back to their  
270 original resolution. These lower-resolution samples are also theoretically relevant, in that they are  
271 more akin to the schematic nature of mental and dream imagery which takes place during rest and  
272 sleep. To replay these samples through the network, the VGG-16 network was temporarily  
273 disconnected at the layer where replay was implemented, and a new input layer was attached which  
274 matched the dimensions of the replay representations. This truncated network was trained on the  
275 replay samples using the same parameters as regular training. After each epoch of replay training, the  
276 replay section of the network was reattached to the original base, and training on real images through  
277 the whole network resumed. To simulate veridical replay, in other words the replay of each individual  
278 experience as it happened, rather than the generation of new samples, we used the activations for  
279 each object at that layer in the network during replay periods. These were not down-sampled during  
280 the process. Given how many examples of a concept we generally encounter, veridical replay of all  
281 experience is not a realistic prospect, which is why prior attempts to simulate replay in smaller-scale

282 networks have also avoided this scenario in their approaches (Kemker & Kanan, 2017; van de Ven et  
283 al., 2020).

284

## 285 **2.5 Replay within a reinforcement learning framework**

286 We tested a process through which items which are most beneficial for replay may be selected in the  
287 brain. We proposed that such selective replay may involve an interaction between the main concept  
288 learning network (VGG-16), and a smaller network which learned through reinforcement which  
289 concepts are most beneficial to replay through the main network during offline periods. The neural  
290 analogue of such a network could be thought of as the hippocampus, as the activity of this structure  
291 precedes the widespread reactivation of neural patterns observed during replay (Zhang et al., 2018).

292 This approach is similar to the “teacher-student” meta-learning framework which has been shown to  
293 improve performance in deep neural networks (Fan, Tian, Qin, Li, & Liu, 2018). The side network was  
294 a simple regression network with 10 inputs, one for each class, and one output, which was the  
295 predicted value for replaying that class through the main network. Classes were chosen and replayed  
296 one at a time, with a batch size of 36. To train the side network, a value of 1 was inputted for the  
297 chosen class, with zeros for the others. The predicted reward for the side network was the change in  
298 performance of the main network after each replay instance, which was quantified by a change in chi-  
299 square; a contrast of the maximum number of possible correct predictions by the main network,  
300 versus its actual correct predictions. A positive reward was therefore a reduction in chi-square, which  
301 resulted in an increase in the side network’s weight for that class. This led to the class being more  
302 likely to be chosen in future, as the network’s weights were converted into a SoftMax layer, from  
303 which classes were selected probabilistically for replay. Through this iterative process, the side  
304 network learned which classes were more valuable to replay, and continually updated its preferences  
305 based on the performance of the main network. Reducing the chi-square in this dynamic manner  
306 improves the overall network accuracy as it progressively reduces the disparity between the network’s  
307 classifications and the actual class identities. To generate initial values for the side network, one batch

308 of each class was replayed through the main network. The Adam optimiser was used with a learning  
309 rate of 0.001 and the objective was to minimise the mean squared error loss. The side network was  
310 trained for 50 epochs with each replay batch. The assessment of network improvement was always  
311 performed on the validation set, and the reported values are accuracy on the test set, reflecting the  
312 ability of the network to generalise to new situations.

313

### 314 **3. Results**

#### 315 **3.1 Localising where in the ventral visual stream generative replay is likely to enhance** 316 **generalisation**

317 We first sought to establish where in the visual brain the replay of category knowledge might be most  
318 effective in helping to generalise to new experiences, as the functional relevance of replay observed  
319 in many different brain regions has yet to be established. To simulate the replay process, we used a  
320 DCNN called VGG-16, which is already experienced at recognising real-world objects as it has learned  
321 to categorise 1000 categories from over one million naturalistic photographs (Simonyan & Zisserman,  
322 2014). Like humans, it can generalise to new situations, and correctly identify the category of an  
323 exemplar it has never seen before. It can therefore be viewed as approximating key aspects of a  
324 mature visual brain that can support the learning of new categories. Humans readily learn new  
325 categories all the time, using previous visual representations to extract useful features such as colour,  
326 texture and shape across multiple experiences with an object. VGG-16 emulates this process by using  
327 the equivalent building blocks of its own visual experience to extract the key features of objects  
328 contained in photographs. Therefore, to simulate new category learning in humans, we tasked this  
329 network with learning 10 new categories of objects it has never encountered before. To obtain a  
330 baseline measure of how the network would perform without replay, the network learned these 10  
331 new categories in the absence of offline replay. This can be thought of as a human learning new  
332 categories in a lab experiment over the course of a single day, without any opportunity to sleep and

333 consolidate this information in between training blocks. Next, we implemented memory replay. We  
334 considered it unrealistic that the human brain could store and replay every single category exemplar  
335 it has experienced. Alternatively, humans readily abstract, and are quick to recognise a prototype, or  
336 “typical” concept which is representative of category members they have seen (Posner & Keele, 1968),  
337 and this process is facilitated by an increased number of experiences (Donald, Joseph, Don, David, &  
338 Steven, 1973). Ultimately, this process is important because having a mental prototype helps us to  
339 differentiate between categories (Reed, 1972). We therefore deemed it more feasible, efficient, and  
340 realistic that humans replay prototypical representations of a category which have been abstracted  
341 across learning. We assume, based on neuroimaging studies, that the category prototypes are  
342 inherited from higher level regions such as the hippocampus and prefrontal cortex (Bowman et al.,  
343 2020), regions which facilitate the learning of concepts (Mack, Love, & Preston, 2018) and imagination  
344 (Hassabis, Kumaran, & Maguire, 2007; Mack, Preston, & Love, 2020) of concepts. For the purposes of  
345 these experiments, we mimic the function of these higher brain regions in generating prototypical  
346 concepts by capturing the “typical” activation of the network for that category and sampling from this  
347 gist-like representation to create novel, abstracted representations for replay (Fig 1A). Most replay  
348 representations were lower resolution than those during learning (see Materials and Methods) for  
349 computational efficiency and to reflect the notional nature of mental imagery.

350 We simulated generative replay from different layers in the DCNN, equivalent to different  
351 brain regions along the ventral stream. Specifically, we trained the network over 10 epochs,  
352 corresponding to 10 days of learning, and replayed prototypical representations after each training  
353 epoch, simulating 10 nights of offline consolidation during sleep. In Fig 1B we show how replay affects  
354 the ability of the network to generalise to new exemplars of the categories over the course of learning,  
355 and Fig 1C shows the final best performing models in each replay condition. There is a differential  
356 benefit of replay throughout the network, where replay in the early layers yields is of limited benefit,  
357 whereas replay in the later layers boosts generalisation performance to a greater degree. This suggests  
358 that early visual areas in the brain do not store sufficiently complex category-specific representations,

359 curtailing the effectiveness of generated replay representations, whereas higher-level regions such as  
 360 the lateral occipital cortex are better positioned to support the generation of novel, prototypical  
 361 concepts which accelerates learning in the absence of real experience and helps us to generalise to  
 362 new situations.  
 363

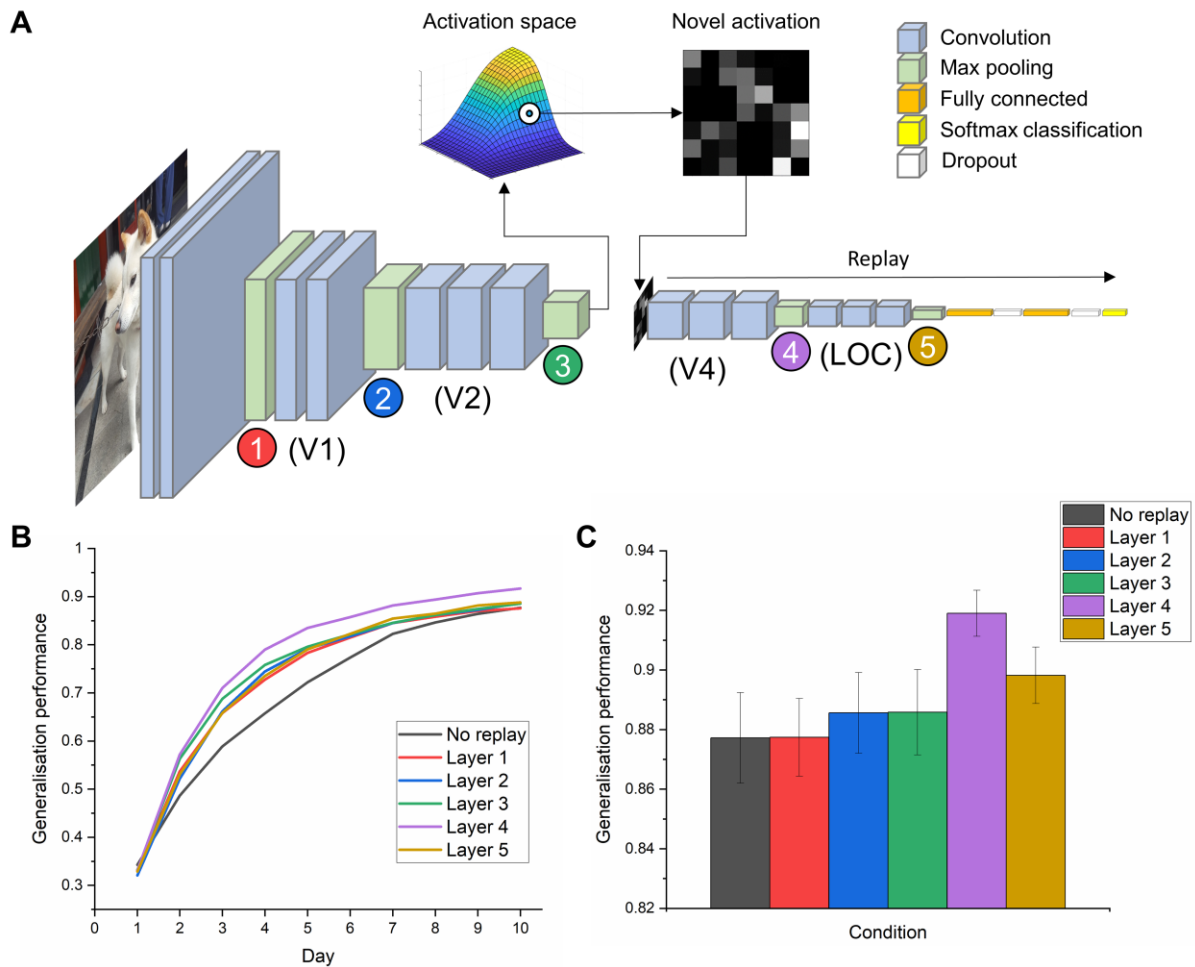

364  
 365 **Fig 1. The effects of generative replay from different layers of a model of the human ventral visual**  
 366 **stream on generalisation to new exemplars.** (A) The VGG-16 network simulates the brain’s visual  
 367 system by looking at photographs and extracting relevant features to help categorise the objects  
 368 within. We trained this network on 10 new categories of objects it had not seen before. In between  
 369 learning episodes, akin to sleep-facilitated consolidation in humans, we implemented offline memory  
 370 replay as a generative process. In other words, the network “imagined” new examples of a category  
 371 based on the distribution of features it has learned so far for that object (activation space), and used

372 these representations (novel representation) to consolidate its memory. The network did not create  
373 an actual visual stimulus to learn from, rather it recreated the neuronal pattern of activity that it would  
374 typically generate from viewing an object from that category. We display here an example of replaying  
375 from a mid-point in the network, but all five locations where replay was implemented are indicated  
376 by the coloured circles. The brain regions corresponding approximately to each network stage, derived  
377 from Güçlü and van Gerven (2015), are listed beneath. (B) The effects of memory replay from different  
378 layers on the network's ability to generalise to new examples of the 10 categories, throughout the  
379 course of 10 learning episodes. Plotted values represent the mean accuracies from 10 different models  
380 which each learned 10 new and different categories. (D) The final recognition accuracies (+/- S.E.M.),  
381 averaged across 10 models, on the new set of photographs after 10 epochs of learning. We reveal the  
382 location in a model of the ventral stream where replay maximally enhances generalisation  
383 performance is an advanced layer which bears a functional correspondence to the lateral occipital  
384 cortex (LOC) in humans. The benefits of replay from other locations were less pronounced, with the  
385 earliest layer showing the least benefit to generalisation.

386

### 387 **3.2 Tracking the benefits of replay across learning**

388 Humans encounter new environments throughout their lives, and novel categories which they wish  
389 to learn. This knowledge is accumulated and refined across multiple experiences, forming a learning  
390 curve for each category. Experiments have focused on the replay of very recently learned information,  
391 therefore it is not clear at what point in this learning curve replay is most effective. One could consider  
392 replay of recently learned information to be more adaptive, for example, one might want to rapidly  
393 consolidate the memory of a plant from which one ate a poisonous berry as one does not want to  
394 repeat that experience. Alternatively, generative replay may be less effective for newly encountered  
395 categories because there are insufficient experiences from which to adequately extract the underlying  
396 prototype. This is a challenging question to address in human experiments, but simulation in an  
397 artificial neural network provides an alternate avenue of investigation. In the second experiment, we



398 extended training to 30 days of experience, interleaved with nights of offline generative replay to  
399 simulate learning over longer timescales (Fig 2A). Guided by the results of experiment one, we  
400 implemented replay from an advanced layer corresponding to the lateral occipital cortex. In Figure  
401 2D, we show that offline generative replay is most effective at improving generalisation to new  
402 exemplars at the earliest stages of learning. This suggests replay facilitates rapid generalisation, which  
403 maximises performance given a limited set of experiences with a category.

404 While establishing that generative replay, or imagining new instances of a category during  
405 offline periods, was highly effective in helping to generalise to new category exemplars, we were  
406 interested to compare generative replay with the unlikely veridical, high-resolution scenario whereby  
407 humans could replay thousands of encounters with individual objects exactly as they were  
408 experienced. We termed this “veridical replay” (Fig 2A), which involved capturing the exact neural  
409 patterns associated with each experienced object during learning, and replaying these from the same  
410 point in the network. As can be seen in Fig 2B, generative replay was comparably effective to veridical  
411 replay of experience in consolidating memory, despite being entirely imagined from the networks  
412 prior experience. This is despite being a low-resolution gist-like representation, perhaps akin to  
413 dreaming about unusual blends of experiences during sleep. This provides compelling support for the  
414 hypothesis that generative replay is the most likely form of category replay in humans, as it is vastly  
415 more efficient to imagine new concepts from an extracted prototype.

416 While the aforementioned results show the benefits of replay under optimal conditions where  
417 humans encounter the same categories every day, there are instances where exposure will be limited.  
418 To what extent can offline replay compensate for this limited learning? We simulated this in our model  
419 of the ventral stream by limiting the learning of actual category photographs to one day, and  
420 substituted all subsequent learning experiences with offline replay, termed “continuous replay” (Fig  
421 2A). This is equivalent to a human learning a new category in a one-time lab experiment, and replaying  
422 this experience during rest and sleep for the following month. Despite the absence of further exposure  
423 to the actual objects, we found the network could increase its generalisation accuracy from 32% to

424 83% purely by replaying imagined instances of concepts it has partially learned. This may partly  
425 account for human’s ability to quickly learn from limited experience. However, it also reveals that  
426 replayed representations are dynamic in nature, as the prototypes generated from that first  
427 experience were not sufficient to train the network to its maximum performance, as is observed when  
428 learning and replay are interleaved. This suggests that replayed representations continue to improve  
429 as they are informed by ongoing learning, therefore generative replay in the human brain throughout  
430 learning can be thought of as a constantly evolving “snapshot” of what has been learned so far about  
431 that category.

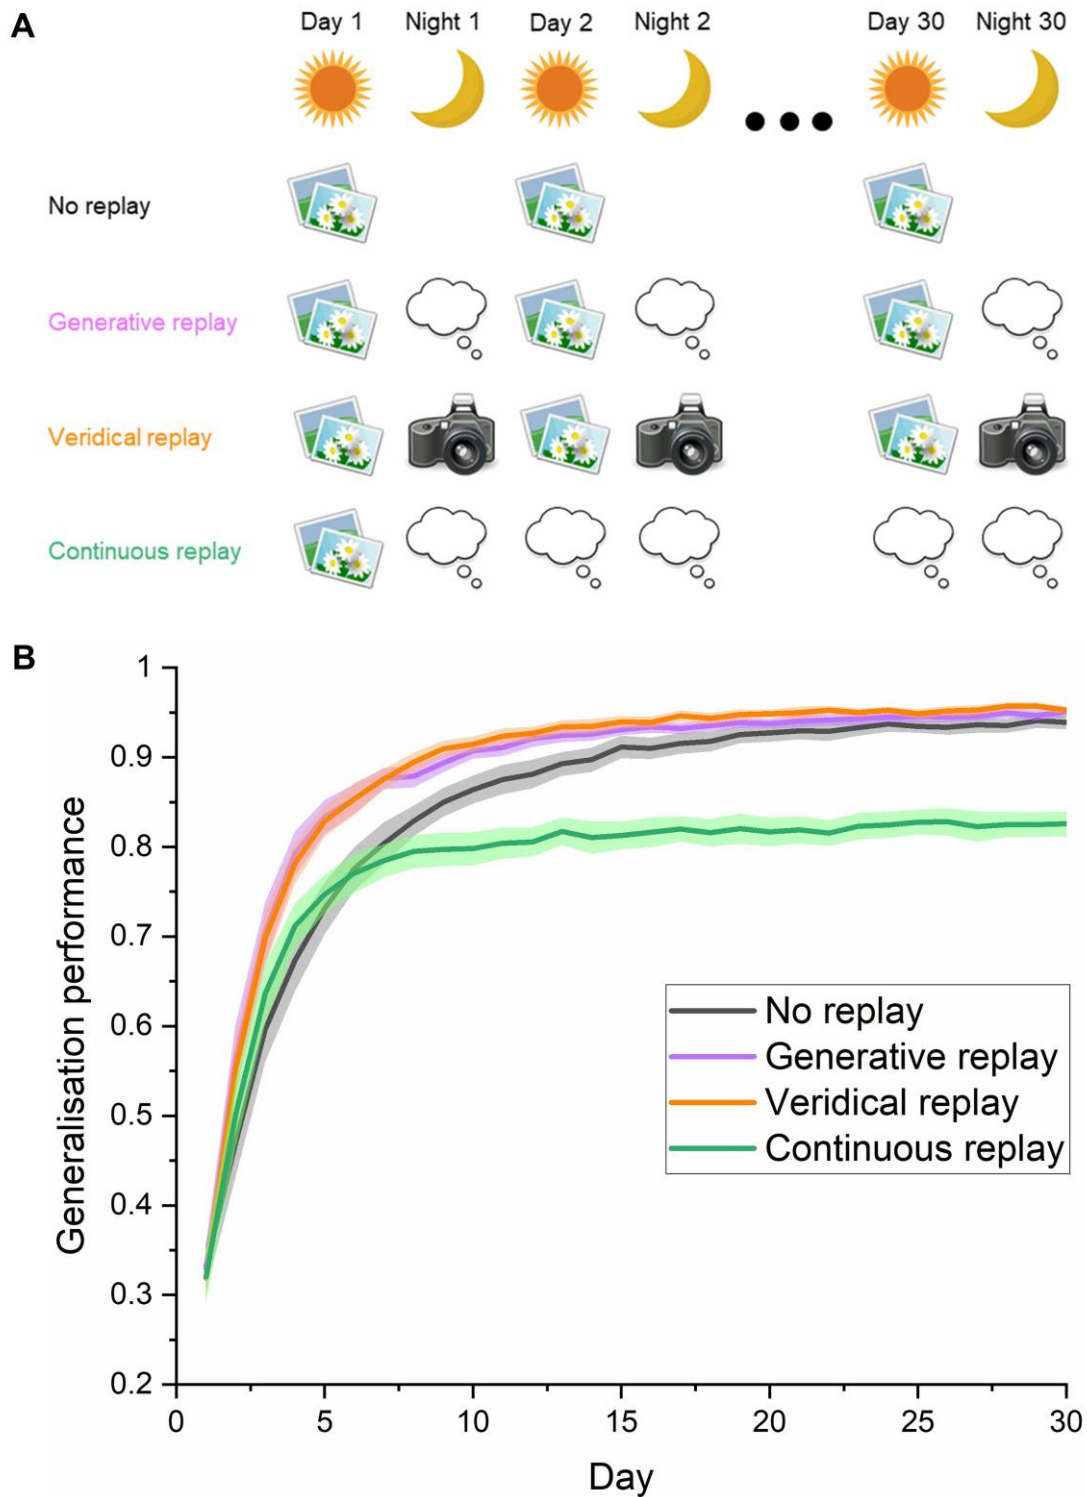

432

433 **Fig 2. The facilitatory effects of memory replay across category learning.** We simulate the long-

434 term consolidation of category memory by extending training to 30 days. (A) Schematic showing the

435 different experimental conditions. “No replay” involves the model of the visual system learning the

436 10 new categories without replay in between episodes. “Generative replay” simulates the brain

437 imagining and replaying novel instances of a category during “night” periods of offline consolidation,  
438 from a layer equivalent to the lateral occipital cortex. “Veridical replay” tests the hypothetical  
439 performance of a human who, each night, replays every single event which has been experienced  
440 the preceding day. “Continuous replay” simulates a single day of learning, followed by days and  
441 nights of replay, investigating the maximum benefit afforded by replay given only brief exposure to a  
442 category. (B) The ability of the network to generalise to new exemplars of a category during each  
443 day throughout the learning process. Generalisation performance is measured by the proportion (+/-  
444 S.E.M) of correctly recognised test images across 10 models. Generative replay maximally increases  
445 performance early in training, suggesting it is critical for new learning and recent memory  
446 consolidation. Despite being comprised of internally generated fictive experiences, generative replay  
447 was comparably effective to veridical replay throughout the learning process, rendering it an  
448 attractive, efficient and more realistic solution to memory consolidation which does not involve  
449 remembering all experiences. Continuous replay after just one day of learning substantially  
450 improved generalisation performance, but never reached the accuracy levels of networks which  
451 engaged in further learning. Replay can therefore compensate for sparse experience to a significant  
452 degree, however its limitations also reveal generative replay to be dynamic process, whereby replay  
453 representations are informed and improved in tandem with ongoing interleaved learning.

454

### 455 **3.3 Determining how the brain might select experiences for replay**

456 Memory consolidation favours weakly-learned information, with a tendency to replay fragile  
457 memories more often (Schapiro et al., 2018). How the brain targets these vulnerable representations  
458 remains a mystery. Memory replay throughout the brain is triggered by hippocampal activity (Zhang  
459 et al., 2018), and given the role of the hippocampus in the generation of prototypes (Bowman et al.,  
460 2020), it is likely the hippocampus selects categories for generative replay. We proposed that replay  
461 may be a learning process in itself, whereby the hippocampus selects replay items, and learns through  
462 feedback from the neocortex the optimal ones to replay. In our previous simulations we selected all

463 categories for replay in equal number, however to simulate the autonomous nature of replay selection  
464 in the brain, we supplemented our model of the ventral visual stream with a small reinforcement  
465 learning network, assuming the theoretical role of the hippocampus in deciding what to replay (Fig  
466 3A). The hippocampal model could choose one of the 10 categories to replay, and received a reward  
467 from the main network for that action, based on the improvement in network performance.  
468 Categories associated with a high reward were more likely to be subsequently replayed, therefore the  
469 hippocampal side network could learn through trial and error which categories to replay more often  
470 in the cortical network.

471         We trained our model of the visual system on 10 novel categories, implementing replay during  
472 offline periods as before, and compared its generalisation performance with that of the dual  
473 interactive hippocampal-cortical model. In terms of overall accuracy, both approaches performed  
474 similarly throughout training (Fig 3B). However, the reinforcement learning network which simulated  
475 the hippocampal replay systematically selected categories which were originally relatively weakly  
476 learned more often (Fig 3C), which resulted in their selective improvement. However, this came at a  
477 cost, with originally well-learned categories being replayed less often and a drop in their generalisation  
478 accuracy. We propose therefore that such a reinforcement learning process may underlie the  
479 “rebalancing” of experience in the brain, and that replay helps to compensate for the fact that some  
480 categories are more difficult to learn than others.

481

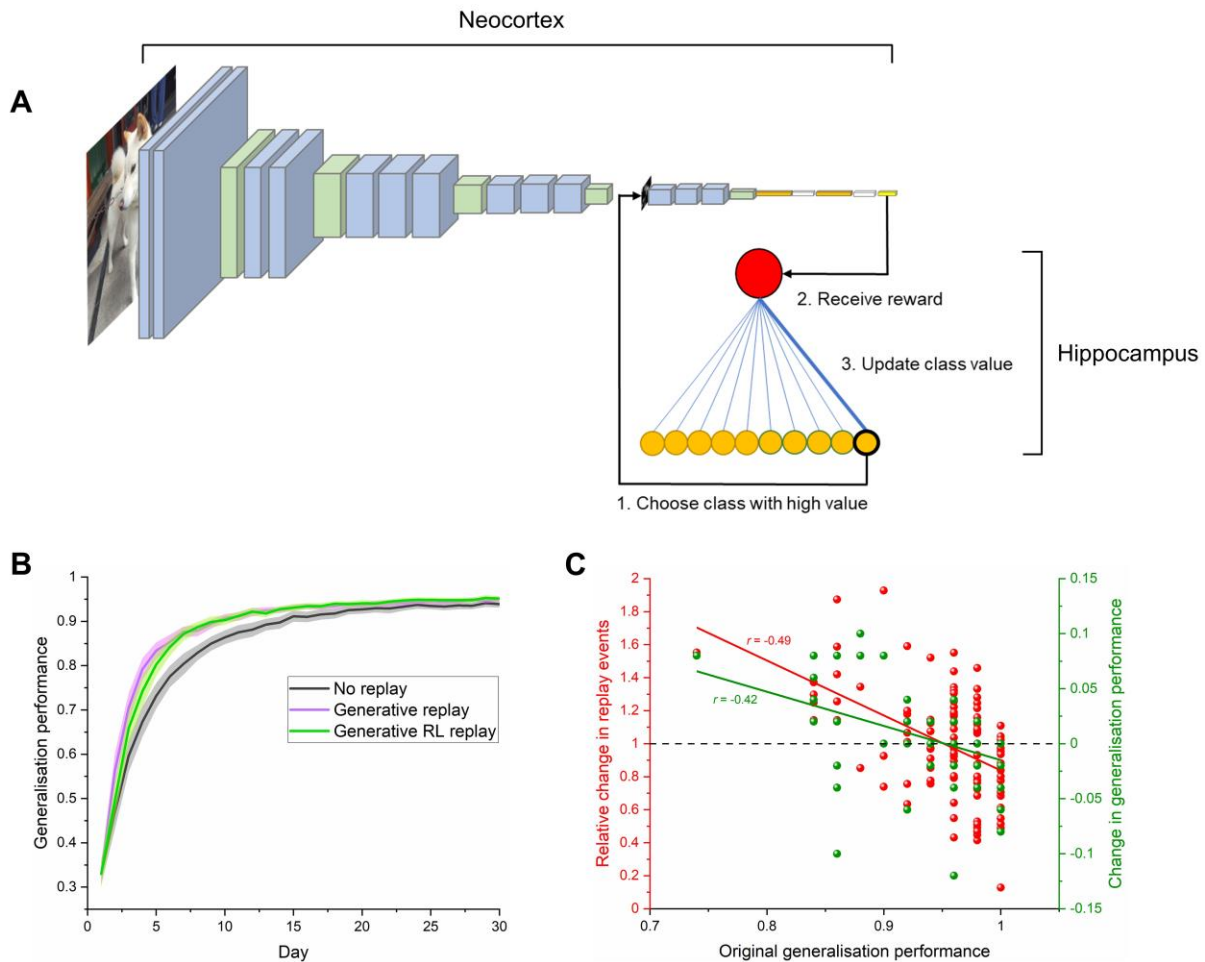

482

483 **Fig 3. Replay as a reinforcement learning process simulates the brain's tendency to consolidate**

484 **weaker knowledge.** (A) Replay in a model of the visual system is controlled by a reinforcement

485 learning (RL) network akin to the hippocampus. The RL network selects one of 10 categories to

486 replay through the visual system and receives a reward based on the improved performance,

487 learning through trial and error which categories to replay. (B) Overall generalisation performance

488 on new category exemplars was similar for both generative replay and generative replay controlled

489 by a reinforcement learning network. Generalisation performance represents mean accuracy (+/-

490 S.E.M) on test images across 10 models which each learned 10 new categories. (C) The RL network

491 learns to replay categories which were originally more difficult for the visual system, and improves

492 their accuracy. This effectively "rebalances" memory such that category knowledge is more evenly

493 distributed, and offers a candidate mechanism as to how the brain chooses weakly learned

494 information for replay. Plotted values represent the 100 categories across 10 models. A proportion  
495 of the generalisation performance values are overlapping.

496

#### 497 **4. Discussion**

498 We simulated the consolidation of category knowledge in a large-scale neural network model which  
499 closely mirrors the form and function of the human ventral visual system, by replaying prototypical  
500 representations thought to be formed and initiated by the hippocampus. The notion that replay of  
501 visual experiences might be generative in nature has been suggested by limited-capacity models which  
502 have been trained on low-resolution photographic images (van de Ven et al., 2020). However, our  
503 results using a realistic model of the visual brain represent the most compelling evidence to date that  
504 humans are unlikely to replay experiences verbatim during rest and sleep to improve category  
505 knowledge, and are more likely to replay novel, imagined instances instead. In addition, the large  
506 number (117,000) of high-resolution complex naturalistic images we used for training in this  
507 experiment reflected real-world learning and facilitated the extraction of gist-like features. While  
508 empirical evidence exists that humans replay novel sequences of stimuli (Liu et al., 2019), our work  
509 suggests that the brain goes further and uses learned features of objects to construct entirely fictive  
510 experiences to replay. We speculate that this creative process is particularly important for the  
511 consolidation of category knowledge as opposed to the replay of episodic memory (Deuker et al.,  
512 2013; Schapiro et al., 2018; Zhang et al., 2018), because of the requirement to abstract prototypical  
513 features and use these to generalise to new examples of a category. We propose that generative  
514 replay confers additional advantages such as constituting less of a burden on memory resources, as  
515 not all experiences need to be remembered. Further, our replay representations were highly effective  
516 in consolidating category knowledge despite being down-sampled, and these compressed, low-  
517 resolution samples would reduce storage requirements further. Perhaps the most convincing  
518 demonstration in our simulations that category replay in the brain likely adopts this compressed,  
519 prototypical format is that it aided generalisation to a similar degree as the exact veridical replay of

520 experience in boosting generalisation performance. Our findings therefore prompt a  
521 reconceptualization of the nature of consolidation-related replay in humans, that it is not only  
522 generative, but also low resolution or “blurry”, as is the case with internally generated imagery in  
523 humans (Giusberti, Cornoldi, De Beni, & Massironi, 1992; Lee, Kravitz, & Baker, 2012). In fact, the kind  
524 of replay we propose here may be the driving force behind the transformation of memory into a more  
525 schematic, generalised form which preserves regularities across experiences while allowing unique  
526 elements of experience to fade (Love & Medin, 1998; Sweegers & Talamini, 2014; Winocur &  
527 Moscovitch, 2011). The challenge for future empirical studies in humans to confirm our hypothesis,  
528 will be to decode prototypical replay representations during rest and sleep.

529         Simulating replay in a human-like network also allowed us to answer a question not currently  
530 tractable in neuroimaging studies: where in the visual stream is replay functionally relevant to  
531 consolidation? In a prior simulation of replay in a neural network, van de Ven et al. (2020)  
532 demonstrated generative replay could attenuate forgetting when performed after the final  
533 convolutional layer, but its effectiveness was not compared to earlier layers, and the network  
534 employed, consisting of five convolutional layers, did not reflect the structure of the human visual  
535 system. Deeper networks, such as the one used here, consisting of 23 layers in total, organised into  
536 five blocks of convolutional layers, not only extract useful category features from naturalistic images,  
537 but representations in network layers can be mapped directly on to specific brain regions along the  
538 ventral visual stream (Devereux et al., 2018; Güçlü & van Gerven, 2015; Khaligh-Razavi & Kriegeskorte,  
539 2014). In keeping with our observation that low-resolution, coarse, schematic replay was effective in  
540 helping the network to generalise, we found the most effective location for replay to be in the most  
541 advanced layers of the network, layers which are less granular in their representations. This  
542 approximately corresponds to the lateral occipital cortex in humans, a region which represents more  
543 complex, high-level features (Güçlü & van Gerven, 2015). In contrast, generative replay from the  
544 earliest layers corresponding to early visual cortex was less effective. These layers are sensitive to low-  
545 level visual features such as contrast, edges and colour, therefore generating samples from these



546 layers will yield rudimentary-level category-specific information, which are of limited utility for replay  
547 and generalisation. High-level representations on the other hand, may contain more unique  
548 combinations and abstractions of these lower-level features. We also found replay from the  
549 penultimate layer was more effective than the final layer, suggesting the optimal replay location  
550 represents a balance between the presence of sufficiently complex category information and the  
551 number of downstream neuronal weights available to be updated based on replaying these features.  
552 These findings prompt a re-evaluation of the functional relevance of replay in early visual cortices in  
553 both animals and humans, and generate specific hypotheses for potential perturbation studies to  
554 investigate the effects of disruptive stimulation at different stages of the ventral stream during offline  
555 consolidation.

556 Our simulations also revealed a phenomenon never before tested in humans, that the  
557 effectiveness of replay depends on the stage of learning. We acquire factual information about the  
558 world sporadically over time across contexts, for example we may encounter a new species at a zoo  
559 one day, and subsequently see the same animal on a wildlife documentary, and so on. Ultimately the  
560 consolidation of semantic information in the neocortex can take up to years to complete (Manns et  
561 al., 2003). However, our simulations show that replay is most beneficial during the initial encounters  
562 with a novel category, when we are still working out its identifiable features and have not yet learned  
563 to generalise perfectly to unseen instances. It is therefore likely humans replay a category less and  
564 less with increasing familiarity, and there is some support for this idea in the animal literature (Giri et  
565 al., 2019). We speculate that the enhanced effectiveness for recent memories may have an adaptive  
566 function, allowing us to generalise quickly with limited information. In fact, our simulations showed  
567 that after a single learning episode, replay can compensate substantially for an absence of subsequent  
568 experience. Our results provide novel hypotheses for human experiments, testing for an interaction  
569 between the stage of category learning and the extent of replay. The fact that replay early in the  
570 learning process was more effective provides further support for our proposal that vague, imprecise  
571 replay events are useful for generalisation, as the networks imaginary representations at that stage

572 would be an imperfect approximation of the category in question. We acknowledge there may be a  
573 “ceiling effect”, whereby later in training there is no further room for improvement, however we  
574 would posit that over the human lifespan, we are operating in the non-converged portion of the  
575 learning curve that we display here.

576 Our results also represent the first mechanistic account of how the brain selects weakly-  
577 learned information for replay and consolidation (Drosopoulos et al., 2007; Kuriyama et al., 2004;  
578 McDevitt et al., 2015; Schapiro et al., 2018). The hippocampus triggers replay events in the neocortex  
579 (Zhang et al., 2018), with a loop of information back and forth between the two brain areas  
580 (Rothschild, Eban, & Frank, 2017), although the content of this neural dialogue is not known. Our  
581 simulations suggest that the hippocampus could learn the optimal categories to replay based on  
582 feedback from the neocortex. Our results showed that such a process resulted in the “rebalancing” of  
583 experience, where generalisation performance was improved for weakly learned items, and  
584 attenuated for items which were strongly learned. This reorganisation of knowledge has been  
585 observed in electrophysiological investigations in rodents, where the neural representations of novel  
586 environments are strengthened through reactivation at the peak of the theta cycle, while those  
587 corresponding to familiar environments are weakened through replay during the trough (Poe, Nitz,  
588 McNaughton, & Barnes, 2000). This more even distribution of knowledge could be adaptive in both  
589 ensuring adequate recognition performance across all categories and forming a more general  
590 foundation on top of which future conceptual knowledge can be built. There have been recent  
591 theoretical and empirical demonstrations of how items get selected for replay within a reinforcement  
592 learning framework, such as the “tagging” of items that elicit a large prediction error during the  
593 learning phase (Momennejad et al., 2018), and the replay of events that are more likely to be  
594 encountered in future and which lead to the highest reward (Liu et al., 2021; Mattar & Daw, 2018).  
595 However, these accounts do not explain why even in the absence of such prediction errors, or without  
596 knowing the likelihood of future events, knowledge which has been weakly-learned during waking  
597 periods is consistently targeted for replay and consolidation during sleep (Drosopoulos et al., 2007;

598 Kuriyama et al., 2004; McDevitt et al., 2015; Schapiro et al., 2018). Our interactive networks suggest  
599 that offline reinforcement learning could account for the selection of weakly-learned knowledge  
600 during the replay process itself, and future experiments could assess whether our models choose the  
601 same categories for replay as humans when trained on the same stimuli.

602 In summary, our simulations provide strong evidence that category replay in humans is a  
603 generative process which is functionally relevant at advanced stages of the ventral stream. We make  
604 testable predictions about when during learning replay is likely to be effective and offer a novel  
605 account of replay as a learning process in and of itself between the hippocampus and neocortex. We  
606 hope these findings encourage a closer dialogue between theoretical models and empirical  
607 experiments. These findings also add credence to the emerging perspective that deep learning  
608 networks are powerful tools which are becoming increasingly well-positioned to resolve challenging  
609 neuroscientific questions (Richards et al., 2019).

610

611 **Acknowledgements:** We thank the Love Lab for helpful discussions on this project. This work was  
612 supported by the National Institutes of Health (grant number 1P01HD080679); the Royal Society  
613 (grant number 183029); and the Wellcome Trust (grant number WT106931MA) to B.C.L. The funders  
614 had no role in study design, data collection and analysis, decision to publish, or preparation of the  
615 manuscript.

616

617 **Conflicts of Interests:** The authors have declared that no conflicts of interests exist.

618

619 **Author Contributions:** D.N.B: Conceptualization, methodology, software, data curation,  
620 investigation, formal analysis, visualization, writing-original draft preparation, writing-review &  
621 editing. B.C.L.: Conceptualization, methodology, resources, funding acquisition, supervision, writing-  
622 review & editing.

623

624 **Data and Code Availability:** The code, environment, and additional information required to run the  
625 simulations is available at <https://github.com/danielbarry1/replay.git> and in the supplementary  
626 information. All relevant data in the paper is available at  
627 <https://doi.org/10.6084/m9.figshare.14208470>.

628

## 629 5. References

- 630 Bowman, C. R., Iwashita, T., & Zeithamova, D. (2020). Tracking prototype and exemplar  
631 representations in the brain across learning. *Elife*, 9. doi:10.7554/eLife.59360
- 632 de Voogd, L. D., Fernández, G., & Hermans, E. J. (2016). Awake reactivation of emotional memory  
633 traces through hippocampal–neocortical interactions. *Neuroimage*, 134, 563-572.  
634 doi:10.1016/j.neuroimage.2016.04.026
- 635 Deng, J., Dong, W., Socher, R., Li, L.-J., Li, K., & Fei-Fei, L. (2009). Imagenet: A large-scale hierarchical  
636 image database. *2009 IEEE conference on computer vision and pattern recognition*, 248-255.
- 637 Deuker, L., Olligs, J., Fell, J., Kranz, T. A., Mormann, F., Montag, C., . . . Axmacher, N. (2013). Memory  
638 consolidation by replay of stimulus-specific neural activity. *The Journal of Neuroscience*,  
639 33(49), 19373-19383. doi:10.1523/jneurosci.0414-13.2013
- 640 Devereux, B. J., Clarke, A., & Tyler, L. K. (2018). Integrated deep visual and semantic attractor neural  
641 networks predict fMRI pattern-information along the ventral object processing pathway. *Sci*  
642 *Rep*, 8(1), 10636. doi:10.1038/s41598-018-28865-1
- 643 Donald, H., Joseph, C., Don, C., David, G., & Steven, S. (1973). Prototype abstraction and  
644 classification of new instances as a function of number of instances defining the prototype.  
645 *Journal of Experimental Psychology*, 101(1), 116-122. doi:10.1037/h0035772
- 646 Drosopoulos, S., Windau, E., Wagner, U., & Born, J. (2007). Sleep enforces the temporal order in  
647 memory. *PLoS One*, 2(4), e376. doi:10.1371/journal.pone.0000376
- 648 Dudai, Y. (2012). The restless engram: consolidations never end. *Annu Rev Neurosci*, 35, 227-247.  
649 doi:10.1146/annurev-neuro-062111-150500
- 650 Eichenlaub, J.-B., Jarosiewicz, B., Saab, J., Franco, B., Kelemen, J., Halgren, E., . . . Cash, S. S. (2020).  
651 Replay of learned neural firing sequences during rest in human motor cortex. *Cell Rep*, 31(5),  
652 107581. doi:10.1016/j.celrep.2020.107581
- 653 Ekman, M., Kok, P., & de Lange, F. P. (2017). Time-compressed preplay of anticipated events in  
654 human primary visual cortex. *Nat Commun*, 8(1), 15276. doi:10.1038/ncomms15276
- 655 Fan, Y., Tian, F., Qin, T., Li, X.-Y., & Liu, T.-Y. (2018). Learning to teach. *arXiv preprint*  
656 *arXiv:1805.03643*.
- 657 French, R. M. (1999). Catastrophic forgetting in connectionist networks. *Trends Cogn Sci*, 3(4), 128-  
658 135. doi:10.1016/S1364-6613(99)01294-2
- 659 Friedrich, M., Wilhelm, I., Born, J., & Friederici, A. D. (2015). Generalization of word meanings during  
660 infant sleep. *Nat Commun*, 6(1), 6004. doi:10.1038/ncomms7004
- 661 Girardeau, G., Inema, I., & Buzsáki, G. (2017). Reactivations of emotional memory in the  
662 hippocampus–amygdala system during sleep. *Nat Neurosci*, 20(11), 1634.  
663 doi:10.1038/nn.4637
- 664 Giri, B., Miyawaki, H., Mizuseki, K., Cheng, S., & Diba, K. (2019). Hippocampal reactivation extends  
665 for several hours following novel experience. *The Journal of Neuroscience*, 39(5), 866-875.  
666 doi:10.1523/JNEUROSCI.1950-18.2018

- 667 Giusberti, F., Cornoldi, C., De Beni, R., & Massironi, M. (1992). Differences in vividness ratings of  
668 perceived and imagined patterns. *British Journal of Psychology*, *83*(4), 533-547.  
669 doi:10.1111/j.2044-8295.1992.tb02457.x
- 670 Güçlü, U., & van Gerven, M. A. (2015). Deep neural networks reveal a gradient in the complexity of  
671 neural representations across the ventral stream. *Journal of Neuroscience*, *35*(27), 10005-  
672 10014. doi:10.1523/JNEUROSCI.5023-14.2015
- 673 Gupta, A. S., van der Meer, M. A., Touretzky, D. S., & Redish, A. D. (2010). Hippocampal replay is not  
674 a simple function of experience. *Neuron*, *65*(5), 695-705. doi:10.1016/j.neuron.2010.01.034
- 675 Hassabis, D., Kumaran, D., & Maguire, E. A. (2007). Using imagination to understand the neural basis  
676 of episodic memory. *The Journal of Neuroscience*, *27*(52), 14365-14374.  
677 doi:10.1523/JNEUROSCI.4549-07.2007
- 678 Hassabis, D., Kumaran, D., Vann, S. D., & Maguire, E. A. (2007). Patients with hippocampal amnesia  
679 cannot imagine new experiences. *Proc Natl Acad Sci U S A*, *104*(5), 1726-1731.  
680 doi:10.1073/pnas.0610561104
- 681 Hayes, T. L., Krishnan, G. P., Bazhenov, M., Siegelmann, H. T., Sejnowski, T. J., & Kanan, C. (2021).  
682 Replay in Deep Learning: Current Approaches and Missing Biological Elements.  
683 <https://arxiv.org/abs/2104.04132>.
- 684 He, K., Zhang, X., Ren, S., & Sun, J. (2015). *Delving deep into rectifiers: Surpassing human-level*  
685 *performance on imagenet classification*. Paper presented at the Proceedings of the IEEE  
686 international conference on computer vision.
- 687 Hermans, E. J., Kanen, J. W., Tambini, A., Fernández, G., Davachi, L., & Phelps, E. A. (2017).  
688 Persistence of amygdala–hippocampal connectivity and multi-voxel correlation structures  
689 during awake rest after fear learning predicts long-term expression of fear. *Cereb Cortex*,  
690 *27*(5), 3028-3041. doi:10.1093/cercor/bhw145
- 691 Horváth, K., Liu, S., & Plunkett, K. (2016). A daytime nap facilitates generalization of word meanings  
692 in young toddlers. *Sleep*, *39*(1), 203-207. doi:10.5665/sleep.5348
- 693 Jafarpour, A., Fuentemilla, L., Horner, A. J., Penny, W., & Duzel, E. (2014). Replay of very early  
694 encoding representations during recollection. *J Neurosci*, *34*(1), 242-248.  
695 doi:10.1523/JNEUROSCI.1865-13.2014
- 696 Ji, D., & Wilson, M. A. (2007). Coordinated memory replay in the visual cortex and hippocampus  
697 during sleep. *Nat Neurosci*, *10*(1), 100-107. doi:10.1038/nn1825
- 698 Kemker, R., & Kanan, C. (2017). Fearnnet: Brain-inspired model for incremental learning. *arXiv*  
699 *preprint arXiv:1711.10563*.
- 700 Khaligh-Razavi, S. M., & Kriegeskorte, N. (2014). Deep supervised, but not unsupervised, models may  
701 explain IT cortical representation. *PLoS Comput Biol*, *10*(11), e1003915.  
702 doi:10.1371/journal.pcbi.1003915
- 703 Kingma, D. P., & Ba, J. (2014). Adam: A method for stochastic optimization. *arXiv preprint*  
704 *arXiv:1412.6980*.
- 705 Kuriyama, K., Stickgold, R., & Walker, M. P. (2004). Sleep-dependent learning and motor-skill  
706 complexity. *Learn Mem*, *11*(6), 705-713. doi:10.1101/lm.76304
- 707 Lee, S. H., Kravitz, D. J., & Baker, C. I. (2012). Disentangling visual imagery and perception of real-  
708 world objects. *Neuroimage*, *59*(4), 4064-4073. doi:10.1016/j.neuroimage.2011.10.055
- 709 Liu, Y., Dolan, R. J., Kurth-Nelson, Z., & Behrens, T. E. J. (2019). Human replay spontaneously  
710 reorganizes experience. *Cell*, *178*(3), 640-652.e614. doi:10.1016/j.cell.2019.06.012
- 711 Liu, Y., Mattar, M. G., Behrens, T. E. J., Daw, N. D., & Dolan, R. J. (2021). Experience replay is  
712 associated with efficient nonlocal learning. *Science*, *372*(6544). doi:10.1126/science.abf1357
- 713 Love, B. C., & Medin, D. L. (1998). SUSTAIN: A model of human category learning. *Aaai/iaai*, 671-676.
- 714 Mack, M. L., Love, B. C., & Preston, A. R. (2018). Building concepts one episode at a time: The  
715 hippocampus and concept formation. *Neurosci Lett*, *680*, 31-38.  
716 doi:10.1016/j.neulet.2017.07.061

- 717 Mack, M. L., Preston, A. R., & Love, B. C. (2020). Ventromedial prefrontal cortex compression during  
718 concept learning. *Nat Commun*, *11*(1), 46. doi:10.1038/s41467-019-13930-8
- 719 Manns, J. R., Hopkins, R. O., & Squire, L. R. (2003). Semantic memory and the human hippocampus.  
720 *Neuron*, *38*(1), 127-133. doi:10.1016/S0896-6273(03)00146-6
- 721 Mattar, M. G., & Daw, N. D. (2018). Prioritized memory access explains planning and hippocampal  
722 replay. *21*(11), 1609-1617. doi:10.1038/s41593-018-0232-z
- 723 McDevitt, E. A., Duggan, K. A., & Mednick, S. C. (2015). REM sleep rescues learning from  
724 interference. *Neurobiol Learn Mem*, *122*, 51-62. doi:10.1016/j.nlm.2014.11.015
- 725 Michelmann, S., Staresina, B. P., Bowman, H., & Hanslmayr, S. (2019). Speed of time-compressed  
726 forward replay flexibly changes in human episodic memory. *Nature Human Behaviour*, *3*(2),  
727 143-154. doi:10.1038/s41562-018-0491-4
- 728 Momennejad, I., Otto, A. R., Daw, N. D., & Norman, K. A. (2018). Offline replay supports planning in  
729 human reinforcement learning. *Elife*, *7*, e32548.
- 730 Peyrache, A., Khamassi, M., Benchenane, K., Wiener, S. I., & Battaglia, F. P. (2009). Replay of rule-  
731 learning related neural patterns in the prefrontal cortex during sleep. *Nat Neurosci*, *12*(7),  
732 919-926. doi:10.1038/nn.2337
- 733 Poe, G. R., Nitz, D. A., McNaughton, B. L., & Barnes, C. A. (2000). Experience-dependent phase-  
734 reversal of hippocampal neuron firing during REM sleep. *Brain Res*, *855*(1), 176-180.  
735 doi:10.1016/S0006-8993(99)02310-0
- 736 Posner, M. I., & Keele, S. W. (1968). On the genesis of abstract ideas. *Journal of Experimental*  
737 *Psychology*, *77*(3), 353. doi:10.1037/h0025953
- 738 Reed, S. K. (1972). Pattern recognition and categorization. *Cognitive Psychology*, *3*(3), 382-407.  
739 doi:10.1016/0010-0285(72)90014-X
- 740 Remy, P. (2020). Keract: A library for visualizing activations and gradients. *GitHub repository*.  
741 Retrieved from <https://github.com/philipperemy/keract>
- 742 Richards, B. A., Lillicrap, T. P., Beaudoin, P., Bengio, Y., Bogacz, R., Christensen, A., . . . Kording, K. P.  
743 (2019). A deep learning framework for neuroscience. *Nat Neurosci*, *22*(11), 1761-1770.  
744 doi:10.1038/s41593-019-0520-2
- 745 Robins, A. (1995). Catastrophic Forgetting, Rehearsal and Pseudorehearsal. *Connection Science*, *7*(2),  
746 123-146. doi:10.1080/09540099550039318
- 747 Rothschild, G., Eban, E., & Frank, L. M. (2017). A cortical-hippocampal-cortical loop of information  
748 processing during memory consolidation. *Nat Neurosci*, *20*(2), 251-259. doi:10.1038/nn.4457
- 749 Russakovsky, O., Deng, J., Su, H., Krause, J., Satheesh, S., Ma, S., . . . Fei-Fei, L. (2015). ImageNet large  
750 scale visual recognition challenge. *International Journal of Computer Vision*, *115*(3), 211-252.  
751 doi:10.1007/s11263-015-0816-y
- 752 Schapiro, A. C., McDevitt, E. A., Chen, L., Norman, K. A., Mednick, S. C., & Rogers, T. T. (2017). Sleep  
753 benefits memory for semantic category structure while preserving exemplar-specific  
754 information. *Sci Rep*, *7*(1), 14869. doi:10.1038/s41598-017-12884-5
- 755 Schapiro, A. C., McDevitt, E. A., Rogers, T. T., Mednick, S. C., & Norman, K. A. (2018). Human  
756 hippocampal replay during rest prioritizes weakly learned information and predicts memory  
757 performance. *Nat Commun*, *9*(1), 3920. doi:10.1038/s41467-018-06213-1
- 758 Schönauer, M., Alizadeh, S., Jamalabadi, H., Abraham, A., Pawlizki, A., & Gais, S. (2017). Decoding  
759 material-specific memory reprocessing during sleep in humans. *Nat Commun*, *8*, 15404.  
760 doi:10.1038/ncomms15404
- 761 Schrimpf, M., Kubilius, J., Hong, H., Majaj, N. J., Rajalingham, R., Issa, E. B., . . . DiCarlo, J. J. (2018).  
762 Brain-Score: Which artificial neural network for object recognition is most brain-Like?  
763 *bioRxiv*, 407007. doi:10.1101/407007
- 764 Schwartenbeck, P., Baram, A., Liu, Y., Mark, S., Muller, T., Dolan, R., . . . Behrens, T. (2021).  
765 Generative replay for compositional visual understanding in the prefrontal-hippocampal  
766 circuit. *bioRxiv*, 2021.2006.2006.447249. doi:10.1101/2021.06.06.447249



- 767 Simonyan, K., & Zisserman, A. (2014). Very deep convolutional networks for large-scale image  
768 recognition. *arXiv preprint arXiv:1409.1556*.
- 769 Srivastava, N., Hinton, G., Krizhevsky, A., Sutskever, I., & Salakhutdinov, R. (2014). Dropout: a simple  
770 way to prevent neural networks from overfitting. *The journal of machine learning research*,  
771 *15*(1), 1929-1958.
- 772 Staresina, B. P., Alink, A., Kriegeskorte, N., & Henson, R. N. (2013). Awake reactivation predicts  
773 memory in humans. *Proc Natl Acad Sci U S A*, *110*(52), 21159-21164.  
774 doi:10.1073/pnas.1311989110
- 775 Sweegers, C. C. G., & Talamini, L. M. (2014). Generalization from episodic memories across time: A  
776 route for semantic knowledge acquisition. *Cortex*, *59*, 49-61.  
777 doi:10.1016/j.cortex.2014.07.006
- 778 Tambini, A., & Davachi, L. (2013). Persistence of hippocampal multivoxel patterns into postencoding  
779 rest is related to memory. *Proc Natl Acad Sci U S A*, *110*(48), 19591-19596.  
780 doi:10.1073/pnas.1308499110
- 781 Tambini, A., Ketz, N., & Davachi, L. (2010). Enhanced brain correlations during rest are related to  
782 memory for recent experiences. *Neuron*, *65*(2), 280-290. doi:10.1016/j.neuron.2010.01.001
- 783 van de Ven, G. M., Siegelmann, H. T., & Tolias, A. S. (2020). Brain-inspired replay for continual  
784 learning with artificial neural networks. *Nat Commun*, *11*(1), 4069. doi:10.1038/s41467-020-  
785 17866-2
- 786 Wilson, M. A., & McNaughton, B. L. (1994). Reactivation of hippocampal ensemble memories during  
787 sleep. *Science*, *265*(5172), 676-679. doi:10.1126/science.8036517
- 788 Wimmer, G. E., Liu, Y., Vehar, N., Behrens, T. E. J., & Dolan, R. J. (2020). Episodic memory retrieval  
789 success is associated with rapid replay of episode content. *Nat Neurosci*, *23*(8), 1025-1033.  
790 doi:10.1038/s41593-020-0649-z
- 791 Winocur, G., & Moscovitch, M. (2011). Memory transformation and systems consolidation. *J Int*  
792 *Neuropsychol Soc*, *17*(5), 766-780. doi:10.1017/S1355617711000683
- 793 Wittkuhn, L., & Schuck, N. W. (2021). Dynamics of fMRI patterns reflect sub-second activation  
794 sequences and reveal replay in human visual cortex. *Nat Commun*, *12*(1), 1795.  
795 doi:10.1038/s41467-021-21970-2
- 796 Zhang, H., Fell, J., & Axmacher, N. (2018). Electrophysiological mechanisms of human memory  
797 consolidation. *Nat Commun*, *9*(1), 4103. doi:10.1038/s41467-018-06553-y  
798

799

800

801

802

803

804

805

806

807

808 Supplementary table 1: List of ImageNet classes by model

|         |                                                                                               |
|---------|-----------------------------------------------------------------------------------------------|
| Model 1 | n12360108 begonia                                                                             |
|         | n02822579 bedstead bedframe                                                                   |
|         | n02427724 waterbuck                                                                           |
|         | n03098688 control room                                                                        |
|         | n02944075 camisole                                                                            |
|         | n01603600 waxwing                                                                             |
|         | n03196598 digital display alphanumeric display                                                |
|         | n02848216 blade                                                                               |
|         | n07712856 tortilla chip                                                                       |
|         | n03592669 jalousie                                                                            |
| Model 2 | n11853356 Christmas cactus Schlumbergera buckleyi Schlumbergera baridgesii                    |
|         | n04177820 settle settee                                                                       |
|         | n03904183 pedestrian crossing zebra crossing                                                  |
|         | n04355511 sundress                                                                            |
|         | n03487444 hand lotion                                                                         |
|         | n12899752 angel's trumpet Brugmansia suaveolens Datura suaveolens                             |
|         | n12655869 raspberry raspberry bush                                                            |
|         | n12948053 common European dogwood red dogwood blood-twig pedwood Cornus sanguinea             |
|         | n02869737 bongo bongo drum                                                                    |
|         | n02415253 Dall sheep Dall's sheep white sheep Ovis montana dalli                              |
| Model 3 | n03375575 foil                                                                                |
|         | n03082807 compressor                                                                          |
|         | n03262932 easy chair lounge chair overstuffed chair                                           |
|         | n02047614 puffin                                                                              |
|         | n03317788 faience                                                                             |
|         | n09475044 wasp's nest wasps' nest hornet's nest hornets' nest                                 |
|         | n11784497 jack-in-the-pulpit Indian turnip wake-robin Arisaema triphyllum Arisaema atrorubens |
|         | n03941231 pinata                                                                              |
|         | n02813399 bay window bow window                                                               |
|         | n04544325 wainscoting wainscotting                                                            |
| Model 4 | n03993053 potty seat potty chair                                                              |
|         | n04082886 reticle reticule graticule                                                          |
|         | n03421324 garter belt suspender belt                                                          |
|         | n03766044 miller milling machine                                                              |
|         | n03505504 headscarf                                                                           |
|         | n12384839 love-in-a-mist running pop wild water lemon Passiflora foetida                      |
|         | n03619793 kitbag kit bag                                                                      |
|         | n07600696 candied apple candy apple taffy apple caramel apple toffee apple                    |
|         | n02068974 dolphin                                                                             |
|         | n03237992 dressing gown robe-de-chambre lounging robe                                         |
| Model 5 | n02918964 bumper car Dodgem                                                                   |
|         | n02392824 white rhinoceros Ceratotherium simum Dicerus simus                                  |



|         |                                                                             |
|---------|-----------------------------------------------------------------------------|
|         | n01806364 blue peafowl Pavo cristatus                                       |
|         | n02956699 capitol                                                           |
|         | n04290079 spun yarn                                                         |
|         | n08596076 littoral litoral littoral zone sands                              |
|         | n02887970 bracelet bangle                                                   |
|         | n10635788 sphinx                                                            |
|         | n07901457 muscat muscatel muscadel muscadelle                               |
|         | n07870167 lasagna lasagne                                                   |
| Model 6 | n04324387 stockroom stock room                                              |
|         | n04591517 wind turbine                                                      |
|         | n02988486 CD-R compact disc recordable CD-WO compact disc write-once        |
|         | n04568069 weathervane weather vane vane wind vane                           |
|         | n04514241 uplift                                                            |
|         | n03207835 dishtowel dish towel tea towel                                    |
|         | n13206817 maidenhair maidenhair fern                                        |
|         | n03307792 external drive                                                    |
|         | n12666965 cape jasmine cape jessamine Gardenia jasminoides Gardenia augusta |
|         | n12950126 valerian                                                          |
| Model 7 | n03986355 portfolio                                                         |
|         | n11848479 night-blooming cereus                                             |
|         | n04439712 tinfoil tin foil                                                  |
|         | n03160740 damask                                                            |
|         | n01612122 sparrow hawk American kestrel kestrel Falco sparverius            |
|         | n09206896 arroyo                                                            |
|         | n12392549 stinging nettle Urtica dioica                                     |
|         | n02343772 gerbil gerbille                                                   |
|         | n07875436 risotto Italian rice                                              |
|         | n02060133 fulmar fulmar petrel Fulmarus glacialis                           |
| Model 8 | n03655072 legging legging leg covering                                      |
|         | n10738111 unicyclist                                                        |
|         | n09270735 dune sand dune                                                    |
|         | n03409393 gable gable end gable wall                                        |
|         | n02331046 rat                                                               |
|         | n03452267 gramophone acoustic gramophone                                    |
|         | n10105733 forward                                                           |
|         | n07911677 cocktail                                                          |
|         | n03797182 muffler                                                           |
|         | n01563128 warbler                                                           |
| Model 9 | n04197110 shipwreck                                                         |
|         | n10470779 priest                                                            |
|         | n02769290 backhoe                                                           |
|         | n03478756 hall                                                              |
|         | n04519153 valve                                                             |
|         | n04289027 sprinkler                                                         |
|         | n02782778 ballpark park                                                     |

|          |                                            |
|----------|--------------------------------------------|
|          | n03558404 ice skate                        |
|          | n04138261 satin                            |
|          | n02700064 alternator                       |
| Model 10 | n03524150 hockey stick                     |
|          | n03716966 mandolin                         |
|          | n02962200 carburetor carburettor           |
|          | n03237340 dresser                          |
|          | n04004210 printed circuit                  |
|          | n02917377 bullhorn loud hailer loud-hailer |
|          | n07879953 tempura                          |
|          | n04087826 ribbing                          |
|          | n02404432 longhorn Texas longhorn          |
|          | n07830593 hot sauce                        |

809

810

811

812
